# Supplementary material
Source: HighWire-hosted journal article supplement (https://spcare.bmj.com/highwire/filestream/152713/field_highwire_adjunct_files/0/spcare-2022-003838supp001_data_supplement.pdf)
Supplement: spcare-2022-003838supp001_data_supplement.pdf [file spcare-2022-003838supp001_data_supplement.pdf]

**Supplemental Table 1. Characteristics of patients.**

|                                   |                            | <b>All patients<br/>(n = 77)</b> |                |
|-----------------------------------|----------------------------|----------------------------------|----------------|
| Age at diagnosis                  | Years                      | mean $\pm$ SD                    | 69.7 $\pm$ 5.3 |
|                                   |                            | median (IQR)                     | 69 (66-73)     |
| Gender                            | Male                       | n (%)                            | 43 (55.8%)     |
|                                   | 0                          | n (%)                            | 24 (31.2%)     |
| ECOG score                        | 1                          | n (%)                            | 30 (39.0%)     |
|                                   | 2                          | n (%)                            | 21 (27.3%)     |
|                                   | 3                          | n (%)                            | 2 (2.6%)       |
| Type of leukaemia<br>and ELN risk | AML with low risk          | n (%)                            | 14 (18.2%)     |
|                                   | AML with intermediate risk | n (%)                            | 30 (39.0%)     |
|                                   | AML with high risk         | n (%)                            | 14 (18.2%)     |
|                                   | AML with unknown risk      | n (%)                            | 9 (11.7%)      |
|                                   | ALL                        | n (%)                            | 10 (13.0%)     |
| Initial treatment received        | Intensive chemotherapy     | n (%)                            | 62 (80.5%)     |
|                                   | HMA                        | n (%)                            | 11 (14.3%)     |
|                                   | TKI only                   | n (%)                            | 1 (1.3%)       |
|                                   | Low-dose chemotherapy      | n (%)                            | 2 (2.6%)       |
|                                   | Palliative care only       | n (%)                            | 1 (1.3%)       |
| GDS score                         |                            |                                  |                |
| Pain                              | 0-10                       | median (IQR)                     | 0 (0-3)        |
| Tiredness                         | 0-10                       | median (IQR)                     | 4 (1-7)        |
| Nausea                            | 0-10                       | median (IQR)                     | 0 (0-1)        |
| Depression                        | 0-10                       | median (IQR)                     | 0 (0-4)        |
| Anxiety                           | 0-10                       | median (IQR)                     | 2 (0-4)        |
| Drowsiness                        | 0-10                       | median (IQR)                     | 2 (0-4)        |
| Appetite                          | 0-10                       | median (IQR)                     | 2 (0-5)        |
| Well-being                        | 0-10                       | median (IQR)                     | 1 (0-4)        |
| Shortness of breath               | 0-10                       | median (IQR)                     | 0 (0-2)        |
| Overall score                     | 0-90                       | median (IQR)                     | 17 (8-33)      |

ECOG = Eastern Cooperative Oncology Group; ELN = European Leukaemia Net; GDS = Global Distress Score; AML = Acute Myeloid Leukaemia; ALL = Acute Lymphoblastic Leukaemia; HMA = Hypomethylating Agent; TKI = Tyrosine Kinase Inhibitor; SD = standard deviation; IQR = interquartile range

**Supplemental Table 2. Association between GDS score and OS**

| <b>Unadjusted analysis</b>          | <b>HR</b> | <b>95% CI</b> | <b>p</b> |
|-------------------------------------|-----------|---------------|----------|
| Linear association (+10 GDS points) | 1.214     | 1.042 - 1.414 | 0.013    |
| GDS ≥ 33 vs GDS < 33 <sup>1</sup>   | 1.890     | 1.079 - 3.309 | 0.026    |
| <b>Adjusted analysis *</b>          | <b>HR</b> | <b>95% CI</b> | <b>p</b> |
| Linear association (+10 GDS points) | 1.190     | 1.007 - 1.407 | 0.042    |
| GDS ≥ 33 vs GDS < 33 <sup>1</sup>   | 2.045     | 1.059 - 3.947 | 0.033    |

Notes: \* = the analysis was adjusted for age at diagnosis, gender, ECOG score, type of leukaemia and ELN risk; <sup>1</sup> = upper quartile of GDS score was equal to 33; GDS = Global Distress Score; HR = hazard ratio; CI = confidence interval; p = p-value.
